# Supplementary material
Source: PubMed Central journal article supplement (PMC6902155)
Supplement: jamafacialplastsurg-21-558-s001.pdf [file jamafacialplastsurg-21-558-s001.pdf]

## Supplementary Online Content

Calloway HE, Heilbronn CM, Gu JT, Pham TT, Barnes CH, Wong BJ-F. Functional outcomes, quantitative morphometry, and aesthetic analysis of articulated alar rim grafts in septorhinoplasty. *JAMA Facial Plast Surg*. Published online October 31, 2019. doi:10.1001/jamafacial.2019.1130

**eTable 1.** Characteristics of Patients and Functional Results

**eTable 2.** Results of Qualitative Aesthetic Analysis

This supplementary material has been provided by the authors to give readers additional information about their work.

eTable 1. Characteristics of Patients and Functional Results

| Characteristic                                                                            |                       | Overall No./No. (%)    |         |                 |
|-------------------------------------------------------------------------------------------|-----------------------|------------------------|---------|-----------------|
| Age, mean (range), y                                                                      |                       | 38.2 (16-71)           |         |                 |
| Female                                                                                    |                       | 62/90 (68.9)           |         |                 |
| Revision operation                                                                        |                       | 36/90 (40.0)           |         |                 |
| Preop NOSE Total Score, mean (SD)                                                         |                       | 70.4 (24.9)            |         |                 |
| Postop NOSE Total Score, mean (SD)                                                        |                       | 25.1 (25.4)            |         |                 |
| AARG Length x width, mean (SD)                                                            |                       | 19.6 (2.4) x 4.8 (1.6) |         |                 |
| Pre and Post Op NOSE Scores (Paired T-Tests)                                              |                       |                        |         |                 |
| Maneuver                                                                                  | Pre-op NOSE Mean (SD) | Post-op NOSE Mean (SD) | P Value | 95% CI          |
| SEG, n = 75                                                                               | 70.9 (24.2)           | 25.9 (26.1)            | .001    | (38.1 to 52.0)  |
| No SEG, n = 15                                                                            | 66.7 (25.7)           | 22. (23.4)             | <.001   | (29.9 to 63.4)  |
| LCT, n = 61                                                                               | 68.2 (28.7)           | 25.7 (26.8)            | <.001   | (33.9 to 51.2)  |
| No LCT, n = 29                                                                            | 74.1 (14.7)           | 24.1 (23.6)            | <.001   | (40.9 to 59.1)  |
| Large AARG, n = 45                                                                        | 76.3 (24.1)           | 31.6 (26.4)            | <.001   | (34.7 to 54.5)  |
| Small AARG, n = 43                                                                        | 65.1 (23.7)           | 19.1 (23.2)            | <.001   | (37.6 to 54.5)  |
| Total AARG, n = 90                                                                        | 70.5 (24.4)           | 25.1 (25.4)            | <.001   | (39.7 to 51.7)  |
| Comparison of Group Differences in Pre and Post NOSE Scores (Independent Samples T-Tests) |                       |                        |         |                 |
|                                                                                           | Mean (SD)             |                        | P Value | (95% CI)        |
|                                                                                           | SEG, n = 63           | No SEG, n = 14         |         |                 |
| Pre-op NOSE                                                                               | 70.7 (24.9)           | 68.7 (25.7)            | 0.77    | (-16.4 to 12.3) |
| Post-op NOSE                                                                              | 25.9 (26.1)           | 22.0 (23.4)            | 0.6     | (-3.9 to 7.4)   |
|                                                                                           | LCT, n = 50           | No LCT, n = 27         |         |                 |
| Pre-op NOSE                                                                               | 68.4 (28.8)           | 74.1 (14.7)            | 0.34    | (-6.1 to 17.5)  |
| Post-op NOSE                                                                              | 25.7 (26.7)           | 24.1 (23.6)            | 0.8     | (-14.1 to 10.9) |
|                                                                                           | Large AARG, n = 37    | Small AARG, n = 38     |         |                 |
| Pre-op NOSE                                                                               | 75.2 (23.3)           | 64.6 (25.9)            | 0.06    | (-21.7 to 0.6)  |
| Post-op NOSE                                                                              | 31.6 (26.4)           | 19.0 (23.4)            | *0.04   | (-24.6 to -0.6) |
| Characteristic                                                                            | Overall No./No. (%)   |                        |         |                 |
| Age, mean (range), y                                                                      | 38.2 (16-71)          |                        |         |                 |
| Female                                                                                    | 62/90 (68.9)          |                        |         |                 |
| Revision operation                                                                        | 36/90 (40.0)          |                        |         |                 |
| Preop NOSE Total Score, mean (SD)                                                         | 70.4 (24.9)           |                        |         |                 |

| Postop NOSE Total Score, mean (SD)                                                        | 25.1 (25.4)            |                        |         |                 |
|-------------------------------------------------------------------------------------------|------------------------|------------------------|---------|-----------------|
| AARG Length x width, mean (SD)                                                            | 19.6 (2.4) x 4.8 (1.6) |                        |         |                 |
| Pre and Post Op NOSE Scores (Paired T-Tests)                                              |                        |                        |         |                 |
| Maneuver                                                                                  | Pre-op NOSE Mean (SD)  | Post-op NOSE Mean (SD) | P Value | (95% CI)        |
| SEG, n = 75                                                                               | 70.9 (24.2)            | 25.9 (26.1)            | .001    | (38.1 to 52.0)  |
| No SEG, n = 15                                                                            | 66.7 (25.7)            | 22. (23.4)             | <.001   | (29.9 to 63.4)  |
| LCT, n = 61                                                                               | 68.2 (28.7)            | 25.7 (26.8)            | <.001   | (33.9 to 51.2)  |
| No LCT, n = 29                                                                            | 74.1 (14.7)            | 24.1 (23.6)            | <.001   | (40.9 to 59.1)  |
| Large AARG, n = 45                                                                        | 76.3 (24.1)            | 31.6 (26.4)            | <.001   | (34.7 to 54.5)  |
| Small AARG, n = 43                                                                        | 65.1 (23.7)            | 19.1 (23.2)            | <.001   | (37.6 to 54.5)  |
| Total AARG, n = 90                                                                        | 70.5 (24.4)            | 25.1 (25.4)            | <.001   | (39.7 to 51.7)  |
| Comparison of Group Differences in Pre and Post NOSE Scores (Independent Samples T-Tests) |                        |                        |         |                 |
|                                                                                           | Mean (SD)              |                        | P Value | (95% CI)        |
|                                                                                           | SEG, n = 63            | No SEG, n = 14         |         |                 |
| Pre-op NOSE                                                                               | 70.7 (24.9)            | 68.7 (25.7)            | .77     | (-16.4 to 12.3) |
| Post-op NOSE                                                                              | 25.9 (26.1)            | 22.0 (23.4)            | .6      | (-3.9 to 7.4)   |
|                                                                                           | LCT, n = 50            |                        |         |                 |
|                                                                                           | No LCT, n = 27         |                        |         |                 |
| Pre-op NOSE                                                                               | 68.4 (28.8)            | 74.1 (14.7)            | .34     | (-6.1 to 17.5)  |
| Post-op NOSE                                                                              | 25.7 (26.7)            | 24.1 (23.6)            | .8      | (-14.1 to 10.9) |
|                                                                                           | Large AARG, n = 37     |                        |         |                 |
|                                                                                           | Small AARG, n = 38     |                        |         |                 |
| Pre-op NOSE                                                                               | 75.2 (23.3)            | 64.6 (25.9)            | .06     | (-21.7 to 0.6)  |
| Post-op NOSE                                                                              | 31.6 (26.4)            | 19.0 (23.4)            | *.04    | (-24.6 to -0.6) |

Supplement Table 2: Results of Qualitative Aesthetic Analysis

| <b>Qualitative Aesthetic Analysis Intra-Class Correlaton Coefficients of 3 Raters</b>                               |                         |                          |                |               |
|---------------------------------------------------------------------------------------------------------------------|-------------------------|--------------------------|----------------|---------------|
|                                                                                                                     | <b>ICC</b>              | <b>p-value</b>           |                |               |
| Alar Furrow Pre                                                                                                     | 0.88                    | <0.001                   |                |               |
| Alar Furrow Post                                                                                                    | 0.704                   | <0.001                   |                |               |
| Alar Ridge Pre                                                                                                      | 0.696                   | <0.001                   |                |               |
| Alar Ridge Post                                                                                                     | 0.433                   | 0.002                    |                |               |
| <b>Comparison of Pre and Post Operative Aesthetic Ratings for Each Rater and Attribute (Paired Samples T-Tests)</b> |                         |                          |                |               |
|                                                                                                                     | <b>Pre-op Mean (SD)</b> | <b>Post-op Mean (SD)</b> | <b>p-value</b> | <b>95% CI</b> |
| Alar Furrow HC                                                                                                      | 2.08 (0.76)             | 2.57 (0.60)              | <0.001         | -0.68, -0.29  |
| Alar Furrow CH                                                                                                      | 2.25 (0.62)             | 2.65 (0.51)              | <0.001         | -0.54, -0.27  |
| Alar Furrow CB                                                                                                      | 1.86 (0.70)             | 2.29 (0.57)              | <0.001         | -0.59, -0.27  |
| Alar Ridge HC                                                                                                       | 1.39 (0.59)             | 1.58 (0.58)              | 0.052          | -0.38, 0.001  |
| Alar Ridge CH                                                                                                       | 1.75 (0.67)             | 1.43 (0.55)              | <0.001         | 0.16, 0.48    |
| Alar Ridge CB                                                                                                       | 2.25 (0.73)             | 2.19 (0.72)              | 0.559          | -0.13, 0.24   |
